# Supplementary material
Source: PubMed Central journal article supplement (PMC7057678)
Supplement: ao9b03624_si_001.pdf [file ao9b03624_si_001.pdf]

# Synthesis of Menthol Glycinates and Their Potential as Cooling Agents

Douglas A. Klumpp<sup>\*,a</sup>, Robert M. Sobel<sup>c</sup>, Smaro G. Kokkinidou<sup>c</sup>, Brian Osei-Badu<sup>a</sup>, Zachary Liveris<sup>a</sup>, Rachel A. Klumpp<sup>b</sup>, and Michael R. Stentzel<sup>a</sup>

<sup>a</sup>Department of Chemistry and Biochemistry

Northern Illinois University

DeKalb, IL 60178

<sup>b</sup>Aurora Christian Schools

2255 Sullivan Road

Aurora, IL 60506

<sup>c</sup>FONA International, Inc.

1900 Averill Rd

Geneva, IL 60134

| <b>Pages</b> | <b>Content</b>                                              |
|--------------|-------------------------------------------------------------|
| S1           | Index                                                       |
| S2-S19       | <sup>1</sup> H and <sup>13</sup> C NMR spectra of compounds |

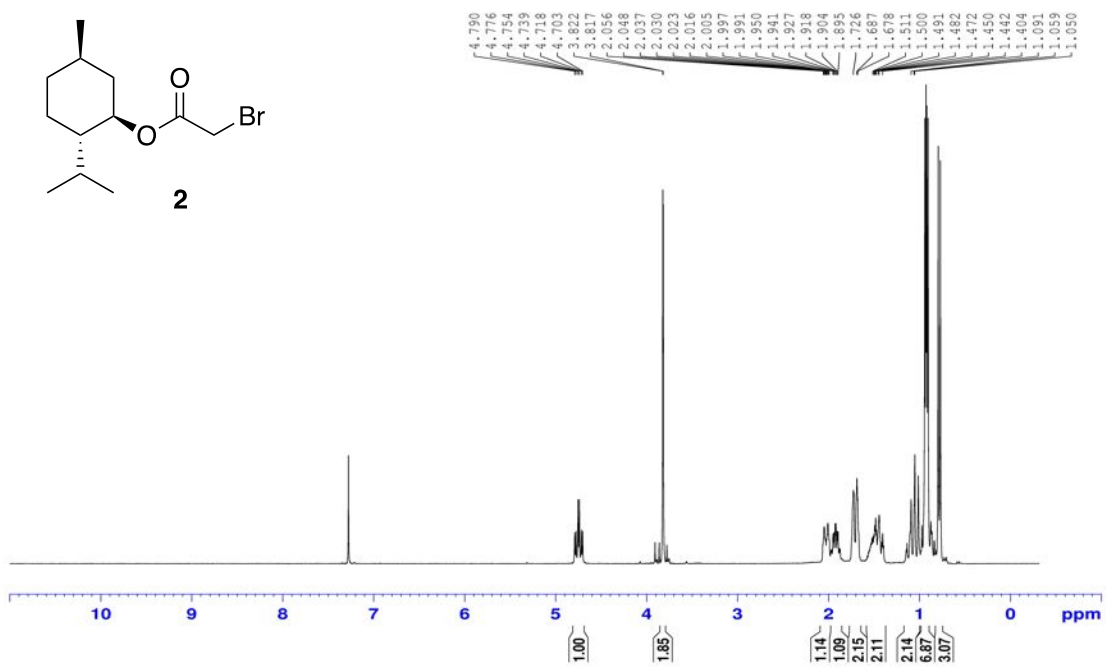

Figure S1. <sup>1</sup>H NMR of compound **2** (CDCl<sub>3</sub>, 300 MHz).

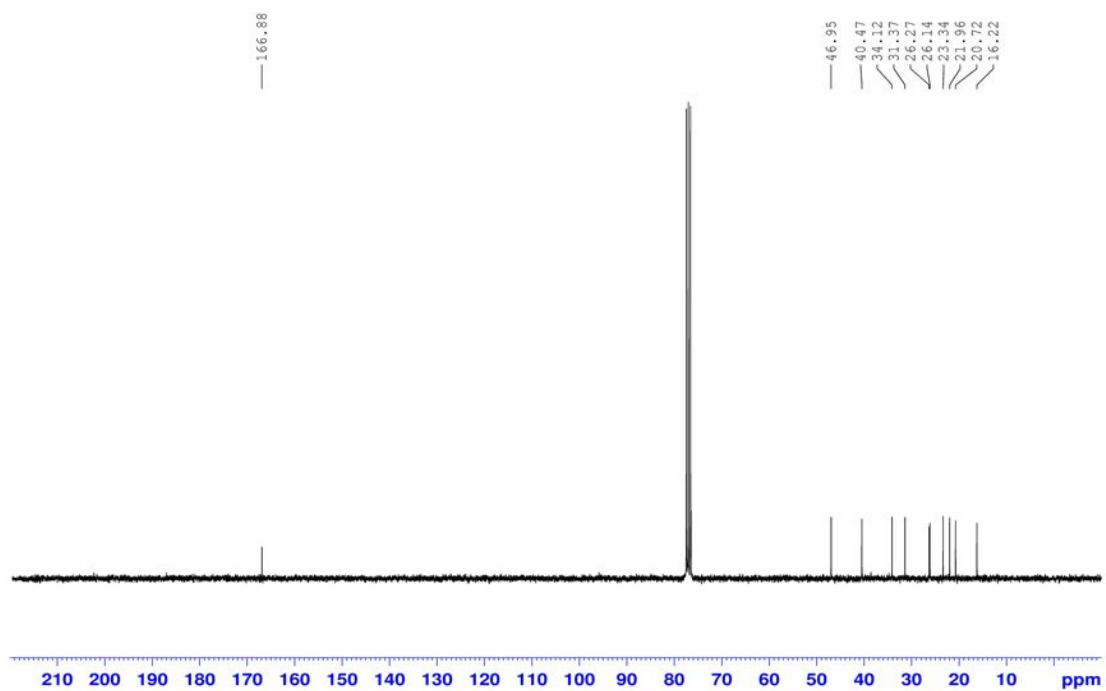

Figure S2. <sup>13</sup>C NMR of compound **2** (CDCl<sub>3</sub>, 75 MHz).

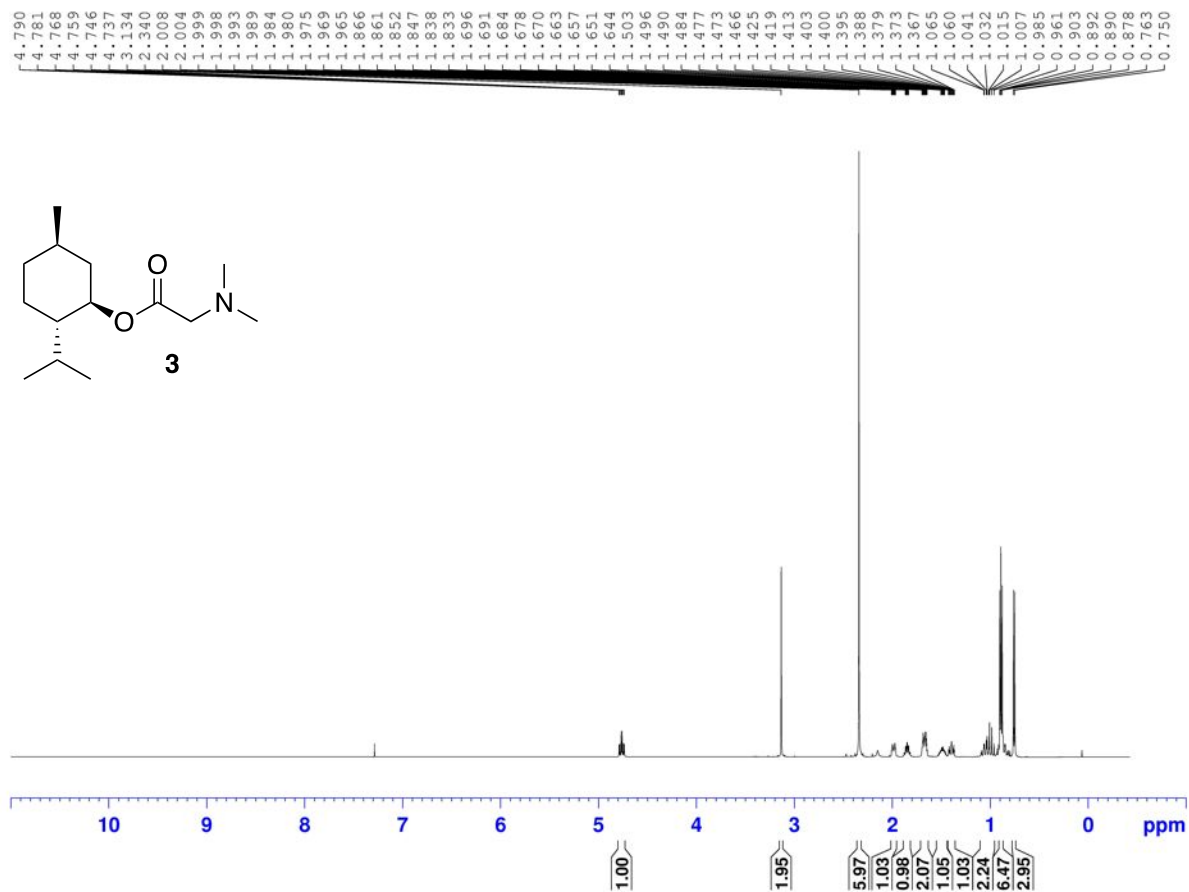

Figure S3. <sup>1</sup>H NMR of compound **3** (CDCl<sub>3</sub>, 300 MHz).

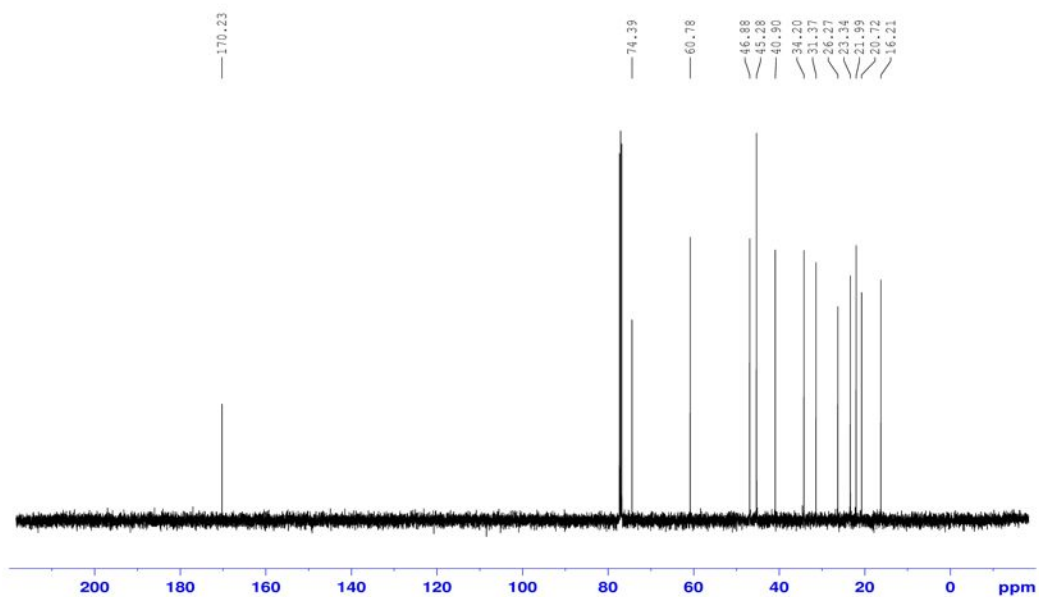

Figure S4. <sup>13</sup>C NMR of compound **3** (CDCl<sub>3</sub>, 75 MHz).

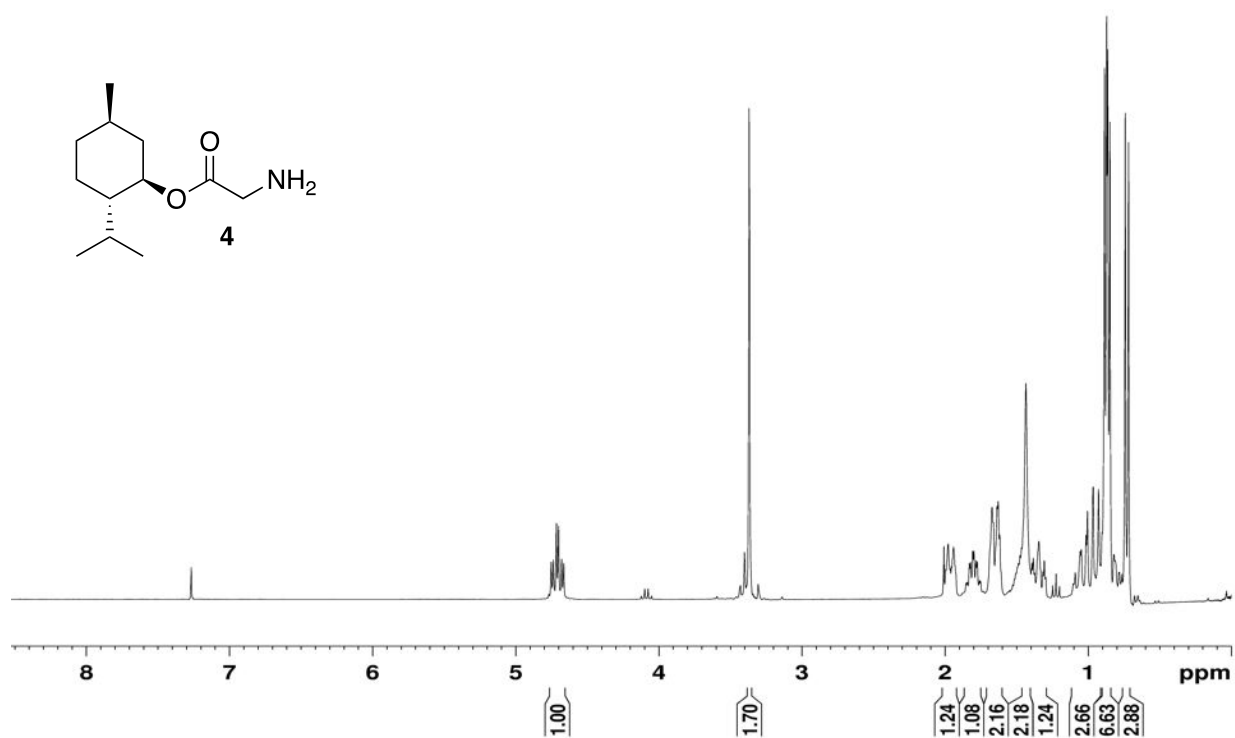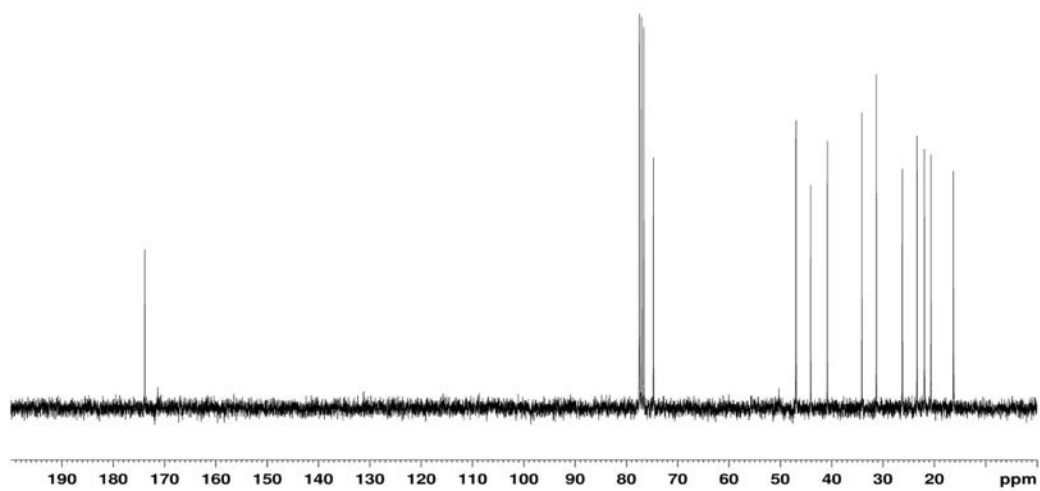

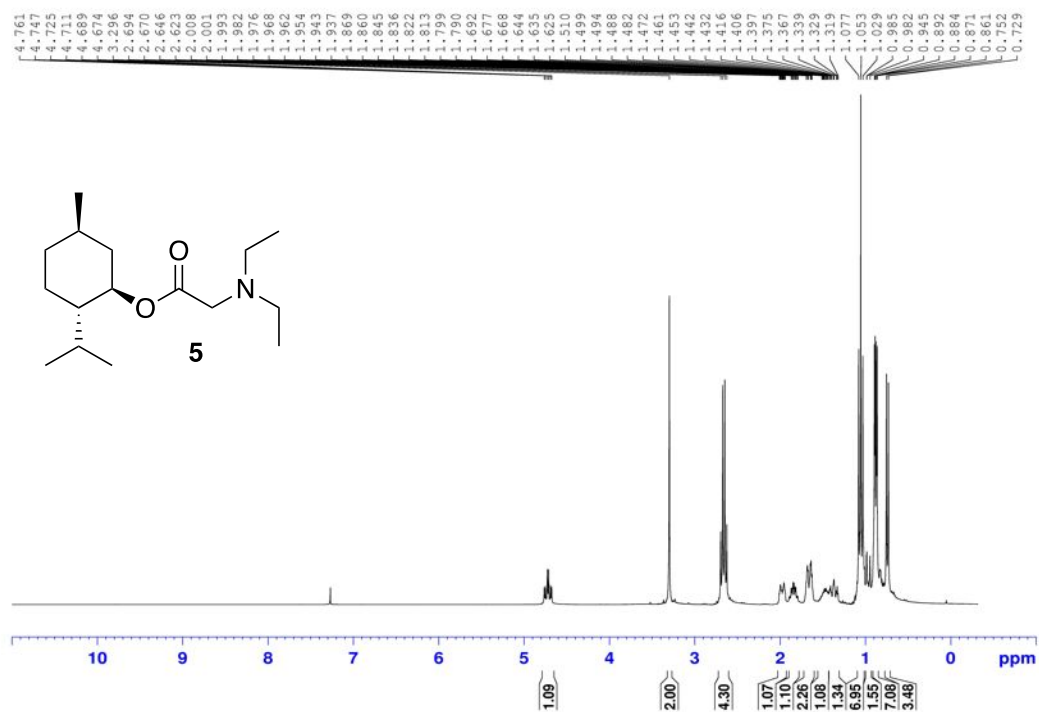

Figure S7. <sup>1</sup>H NMR of compound 5 (CDCl<sub>3</sub>, 300 MHz).

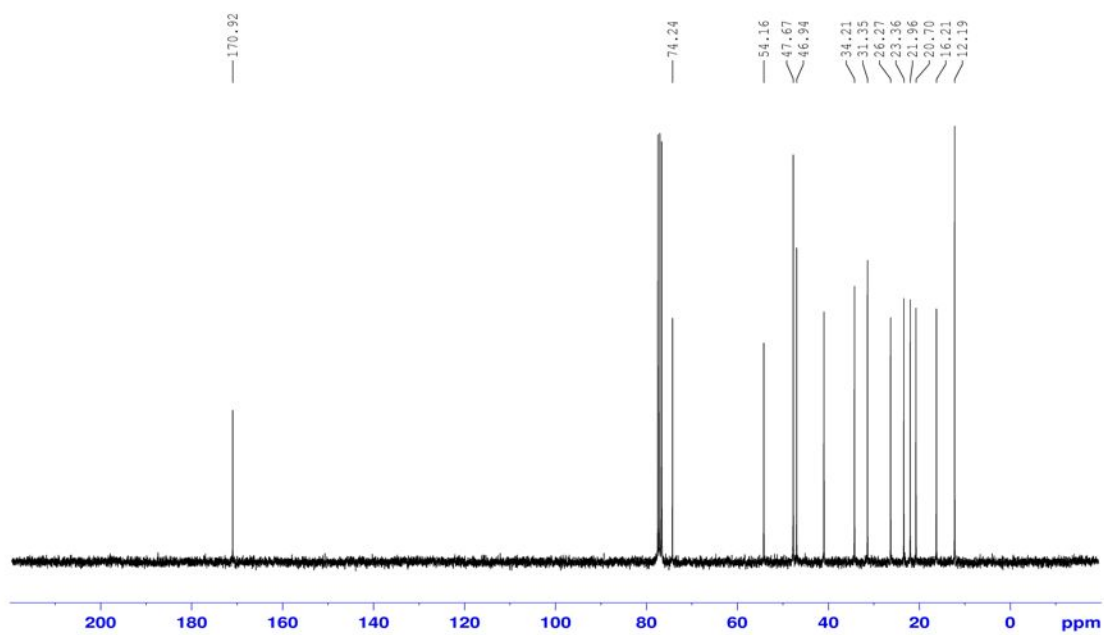

Figure S8. <sup>13</sup>C NMR of compound 5 (CDCl<sub>3</sub>, 75 MHz).

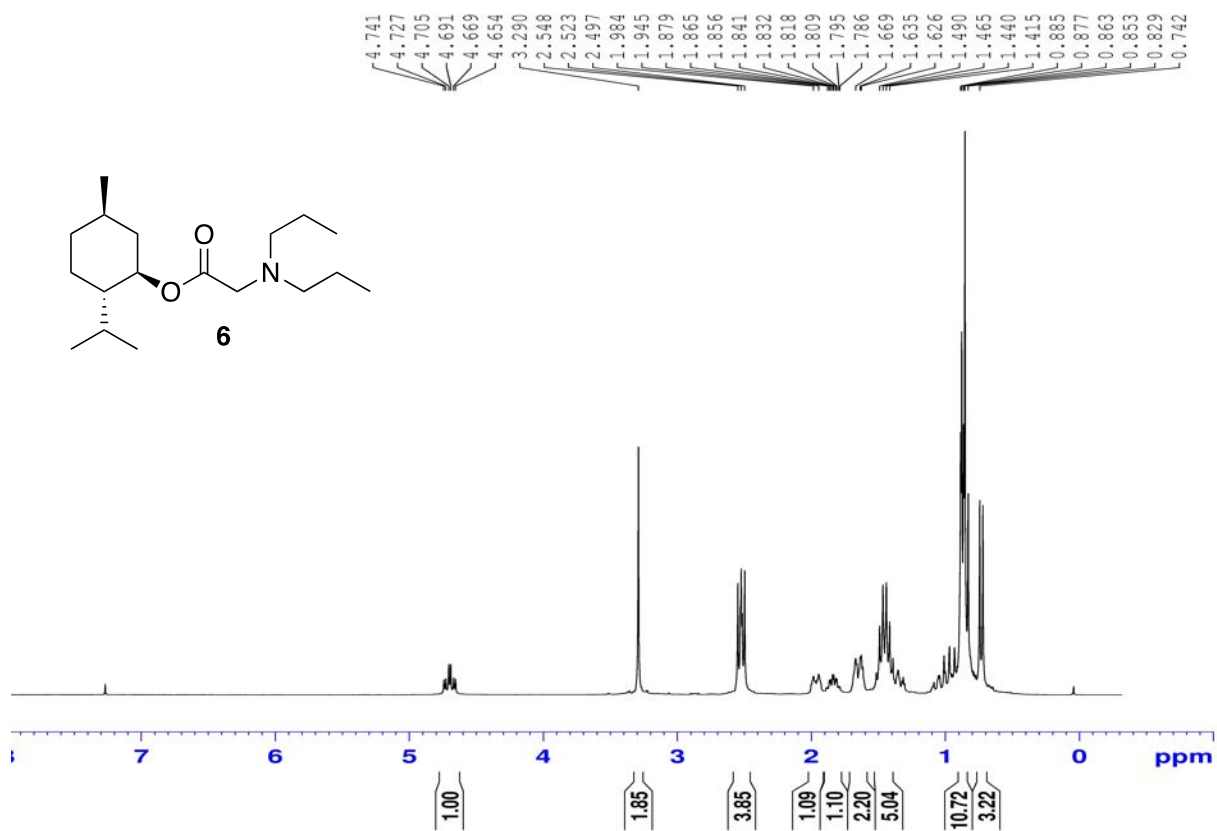

Figure S9. <sup>1</sup>H NMR of compound 6 (CDCl<sub>3</sub>, 300 MHz).

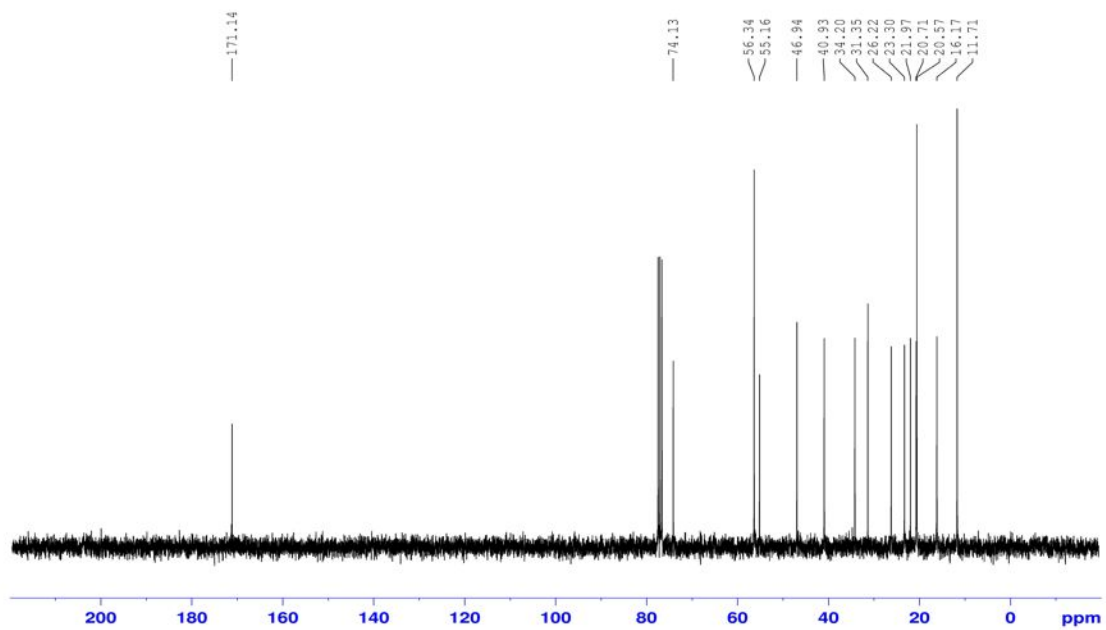

Figure S10. <sup>13</sup>C NMR of compound 6 (CDCl<sub>3</sub>, 75 MHz).

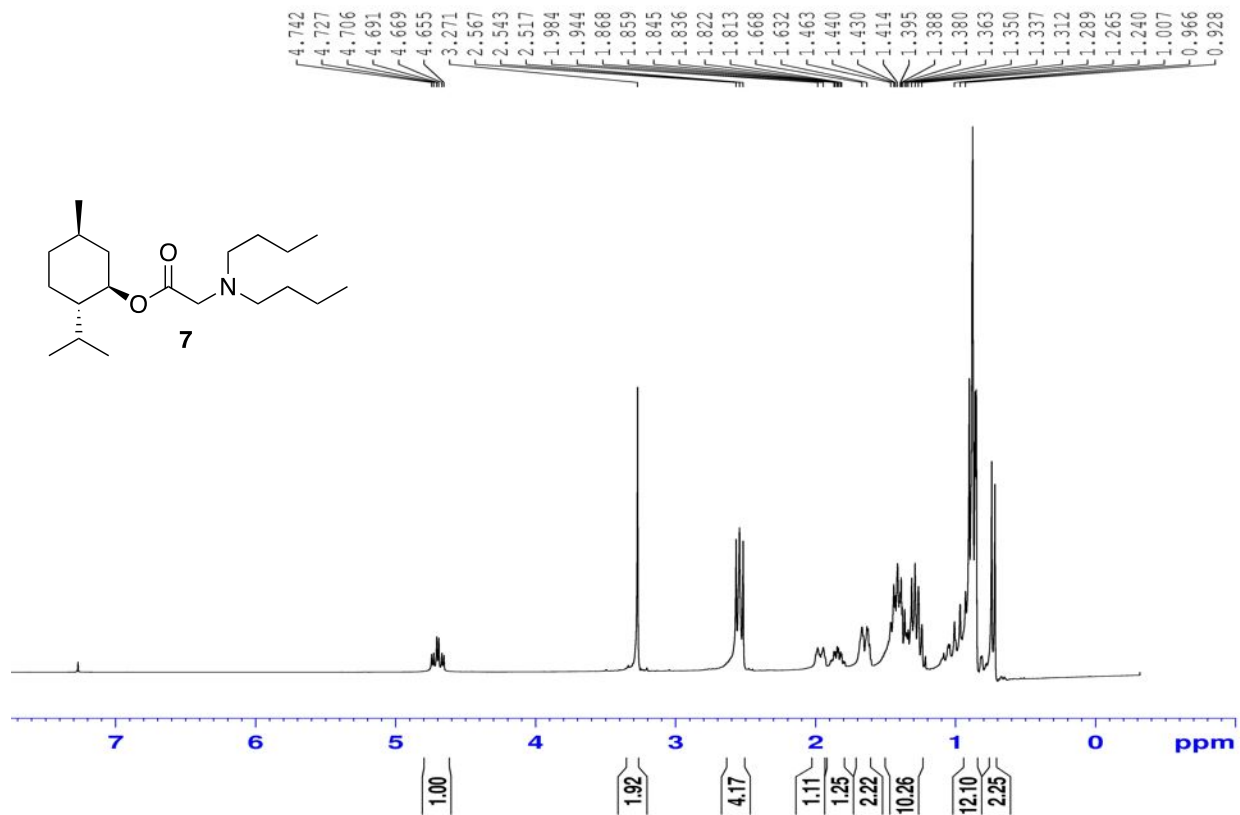

Figure S11. <sup>1</sup>H NMR of compound 7 (CDCl<sub>3</sub>, 300 MHz).

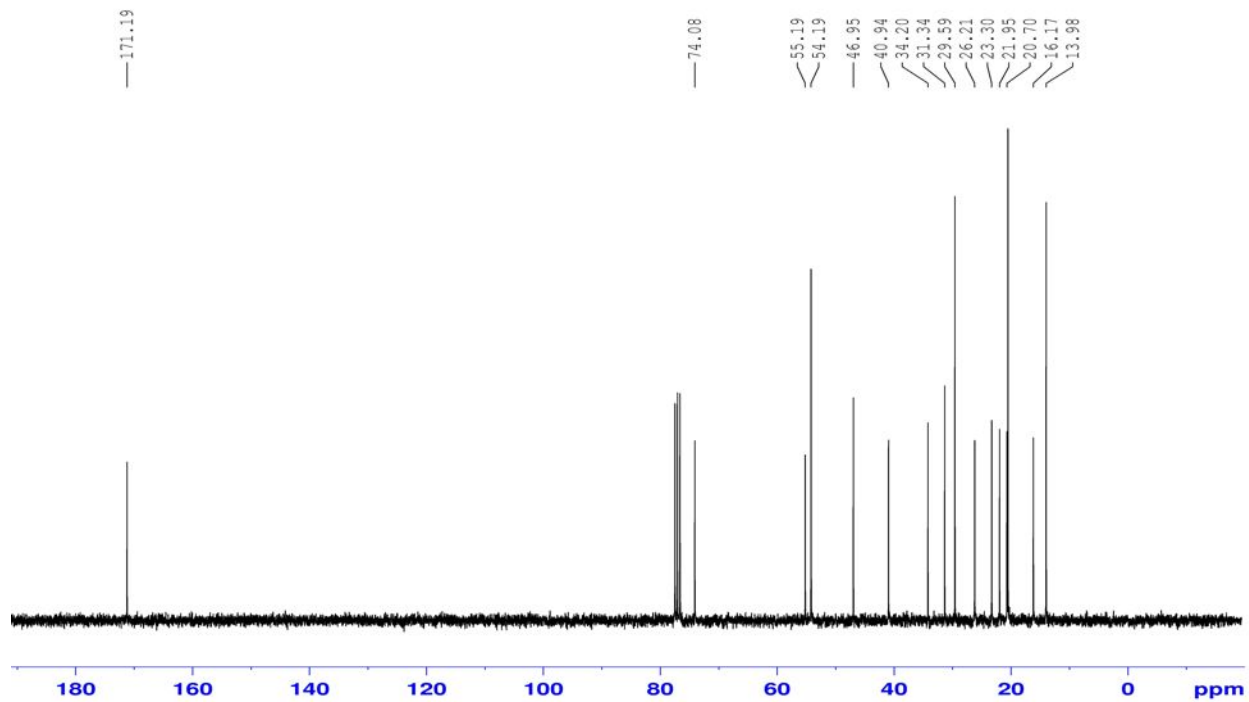

Figure S12. <sup>13</sup>C NMR of compound 7 (CDCl<sub>3</sub>, 75 MHz).

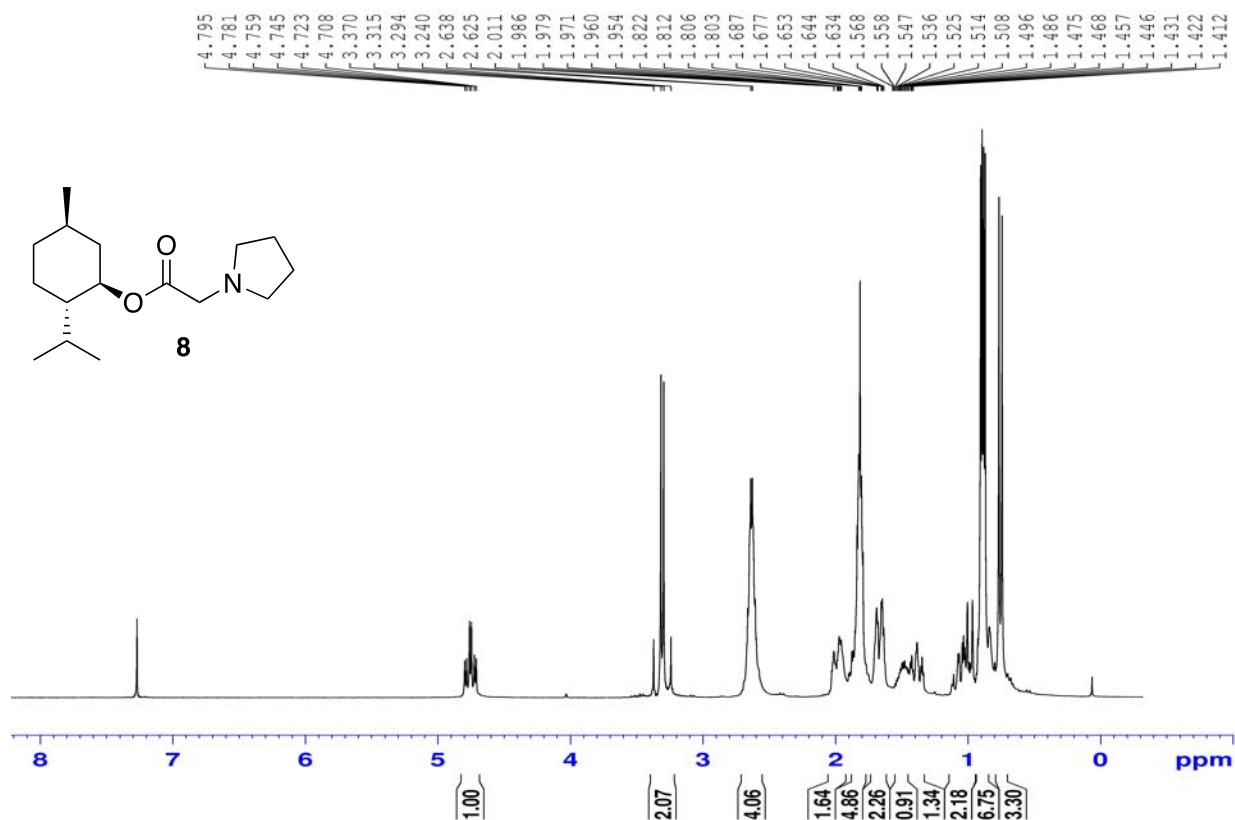

Figure S13. <sup>1</sup>H NMR of compound **8** (CDCl<sub>3</sub>, 300 MHz).

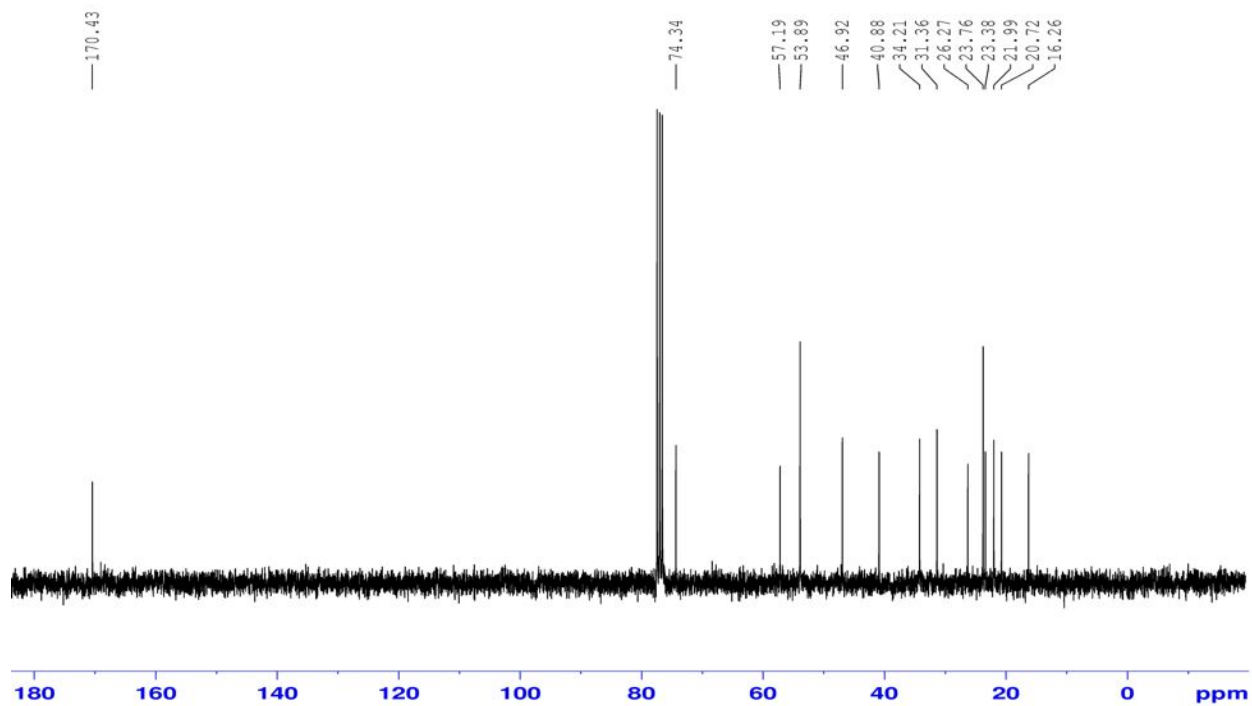

Figure S14. <sup>13</sup>C NMR of compound **8** (CDCl<sub>3</sub>, 75 MHz).



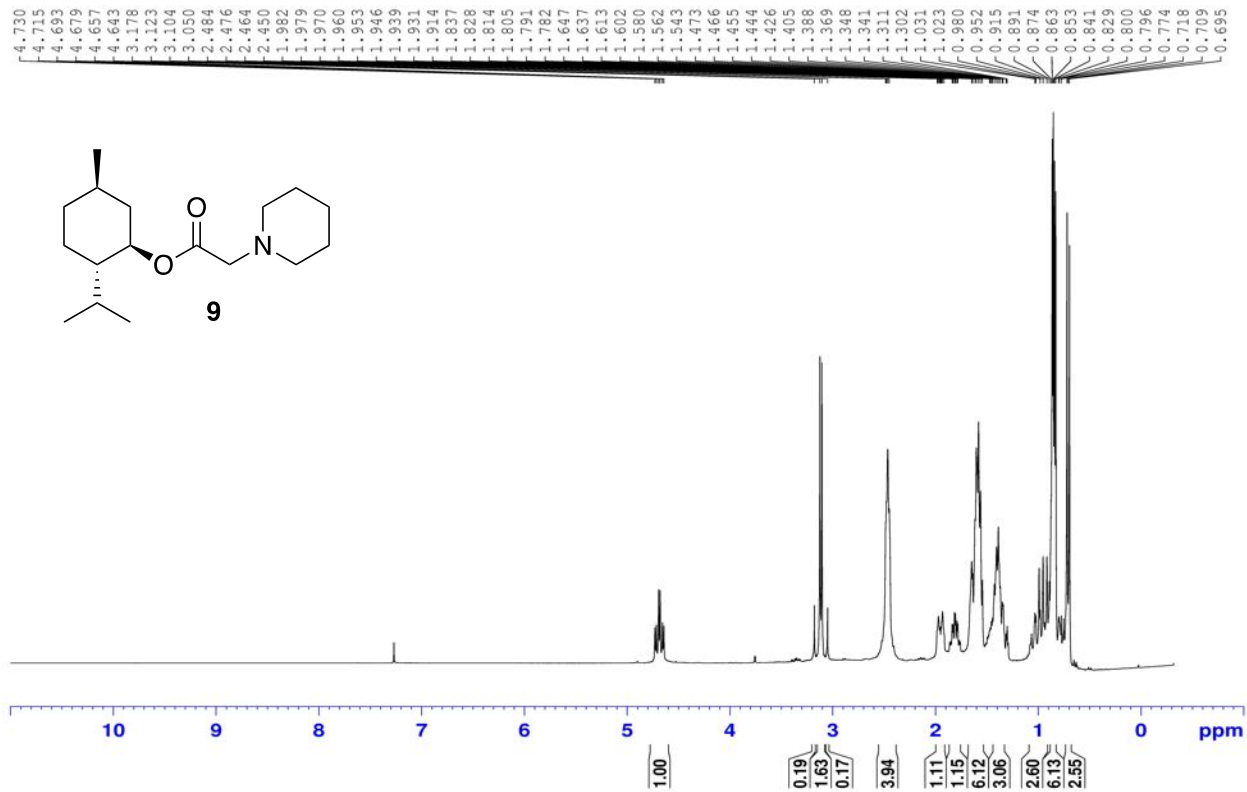

**Figure S15.**  $^1\text{H}$  NMR of compound 9 ( $\text{CDCl}_3$ , 300 MHz).

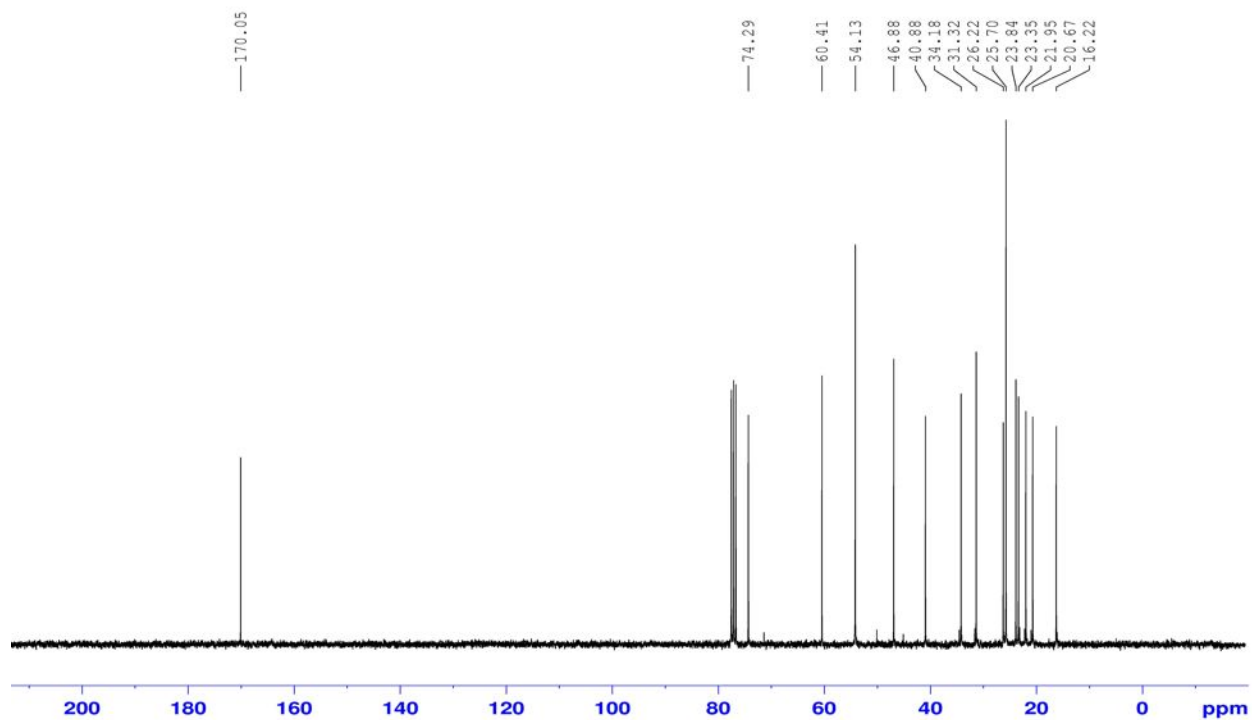

**Figure S16.**  $^{13}\text{C}$  NMR of compound 9 ( $\text{CDCl}_3$ , 75 MHz).

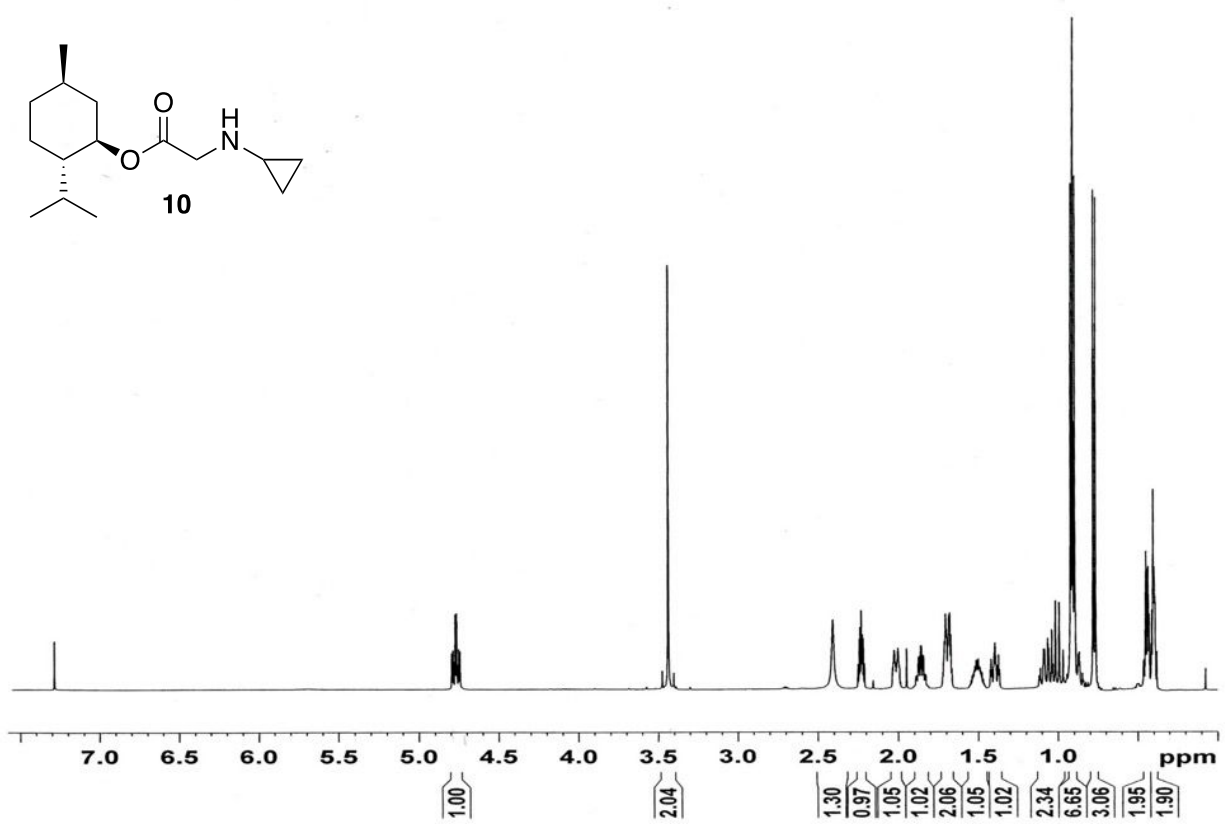

Figure S17. <sup>1</sup>H NMR of compound **10** (CDCl<sub>3</sub>, 300 MHz).

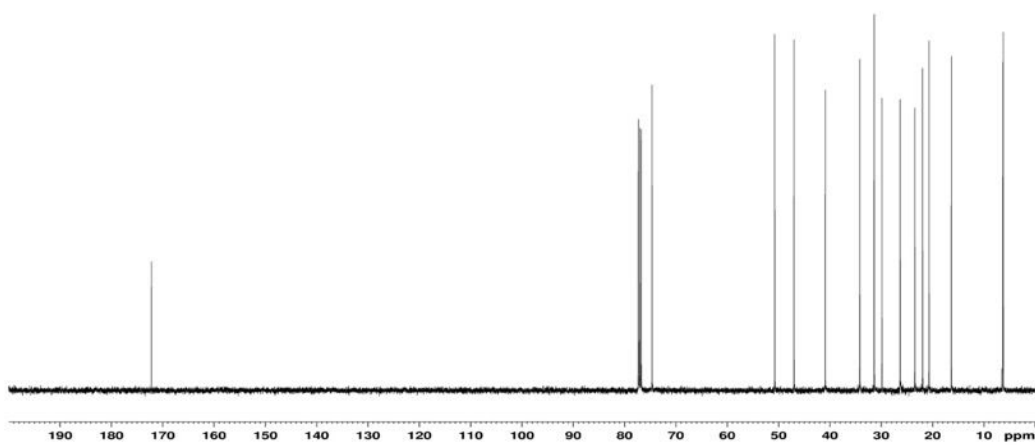

Figure S18. <sup>13</sup>C NMR of compound **10** (CDCl<sub>3</sub>, 75 MHz).

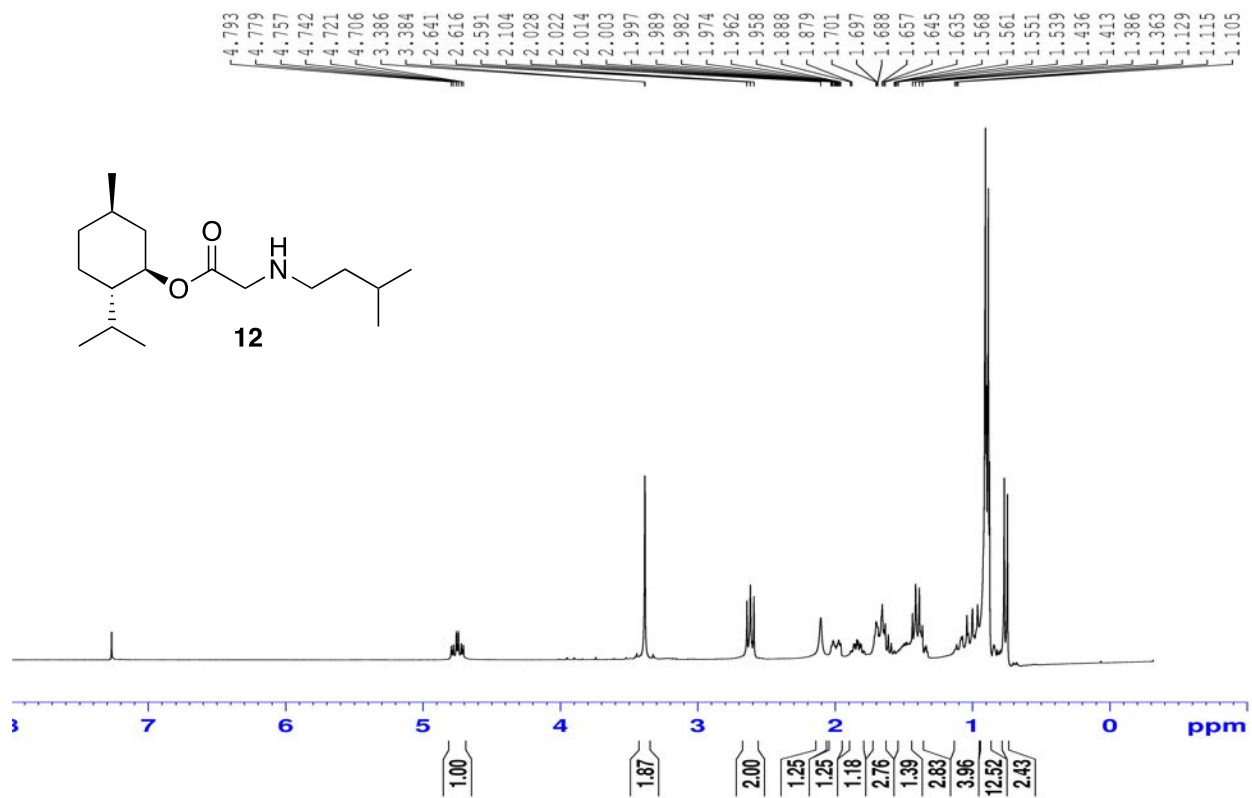

Figure S19. <sup>1</sup>H NMR of compound **12** (CDCl<sub>3</sub>, 300 MHz).

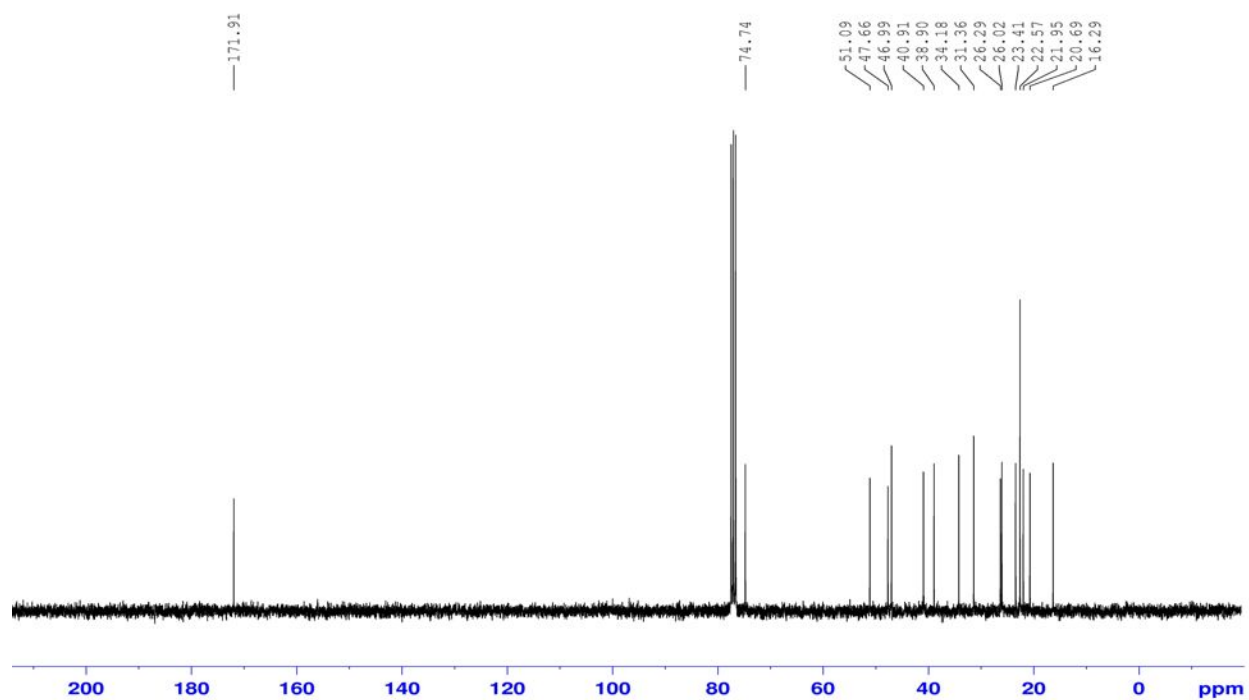

Figure S20. <sup>13</sup>C NMR of compound **12** (CDCl<sub>3</sub>, 75 MHz).

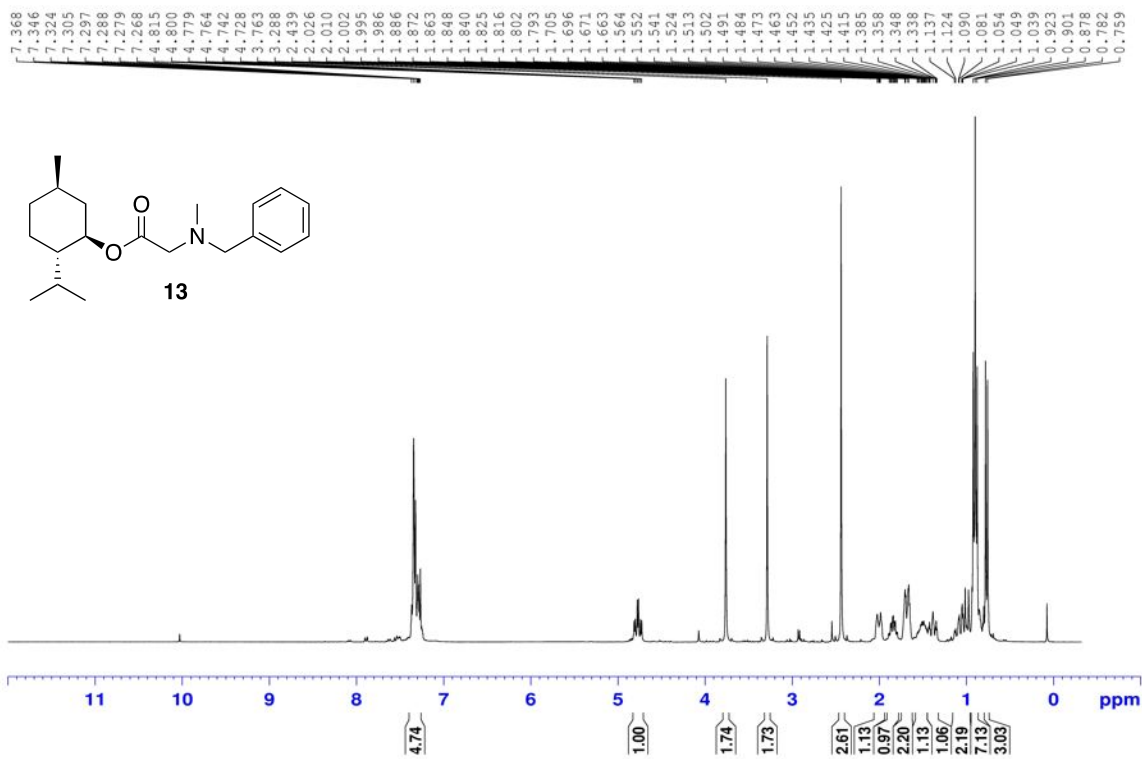

Figure S21. 1H NMR of compound **13** (CDCl<sub>3</sub>, 300 MHz).

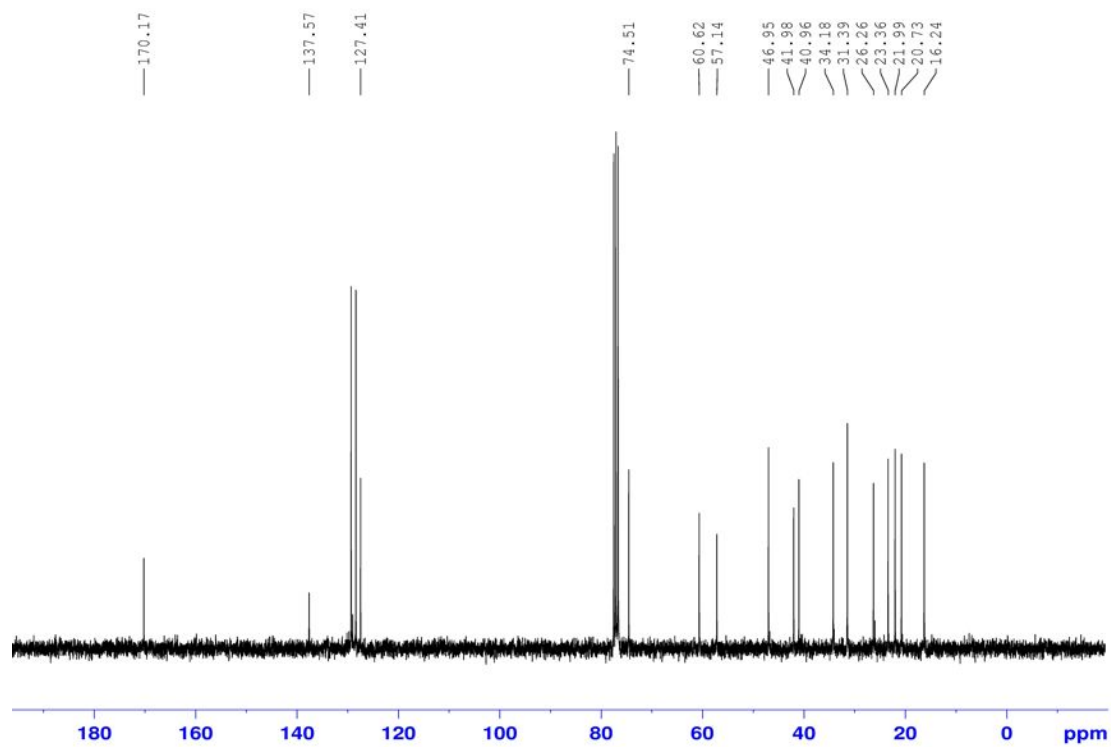

Figure S22. 13C NMR of compound **2** (CDCl<sub>3</sub>, 75 MHz).

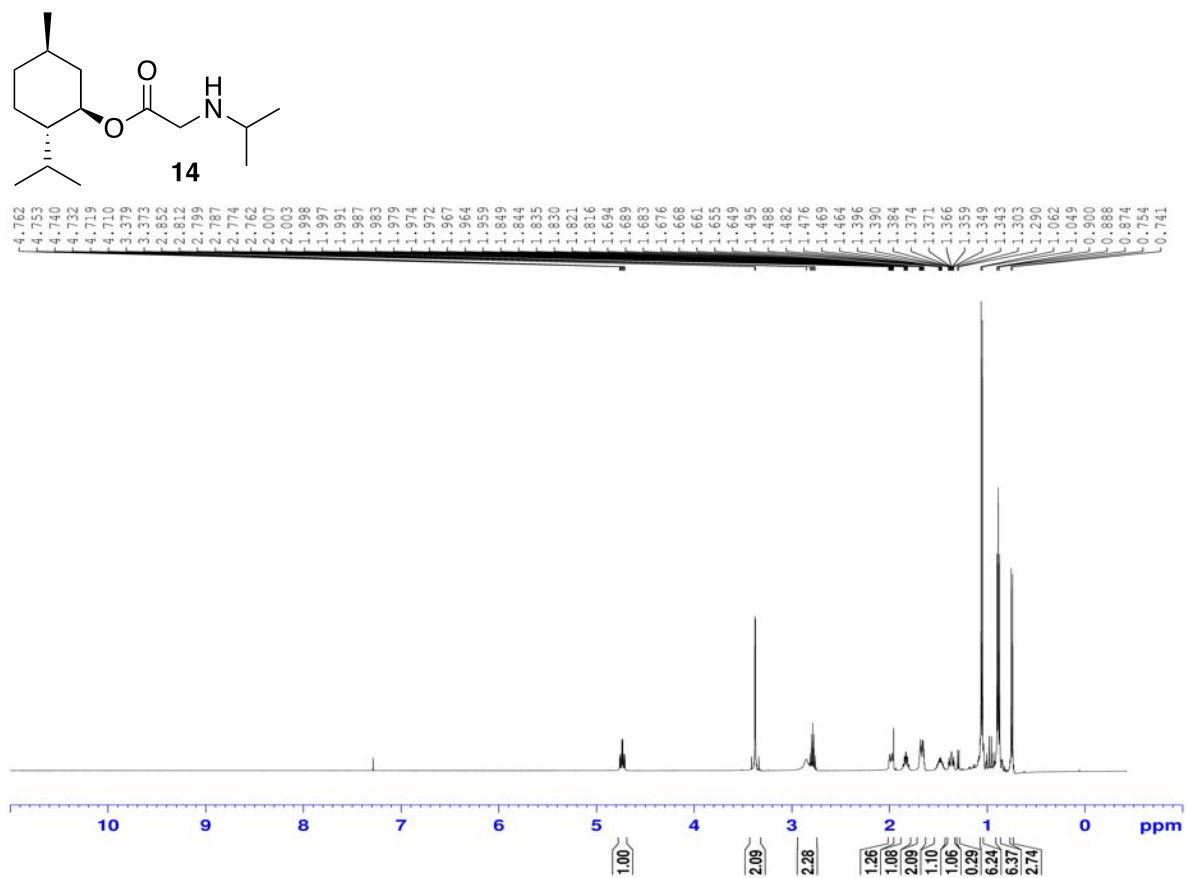

Figure S23. <sup>1</sup>H NMR of compound **14** (CDCl<sub>3</sub>, 300 MHz).

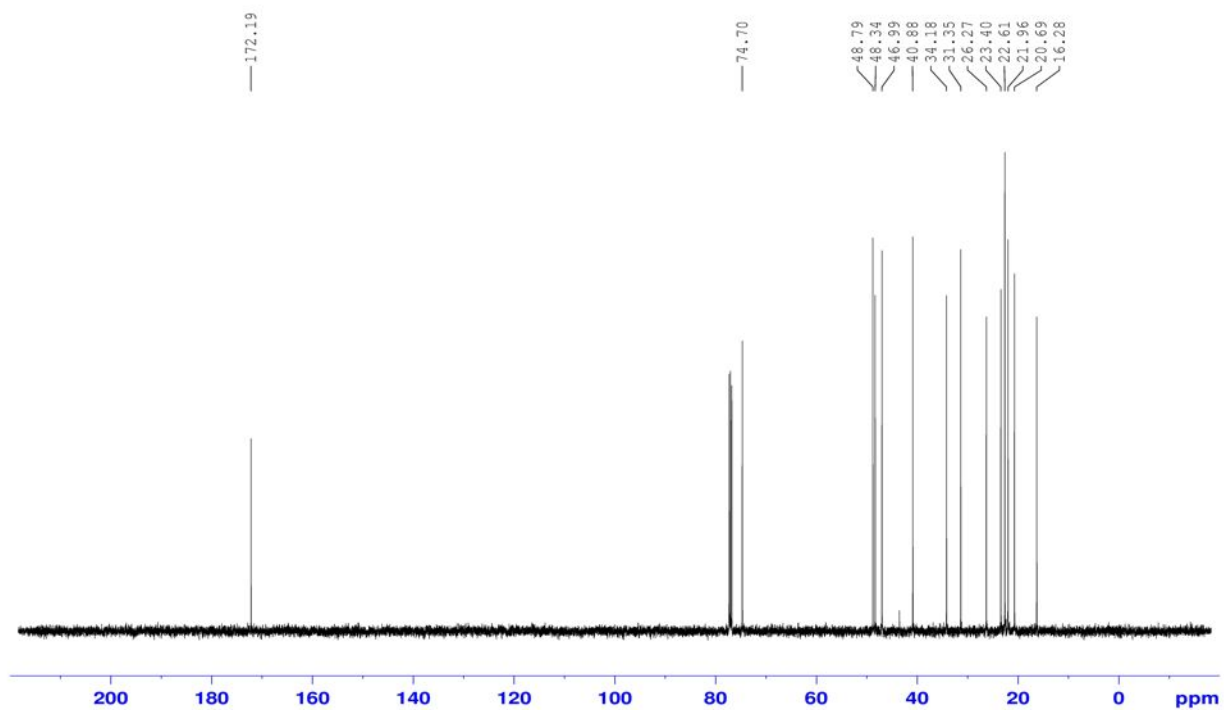

Figure S24. <sup>13</sup>C NMR of compound **14** (CDCl<sub>3</sub>, 75 MHz).

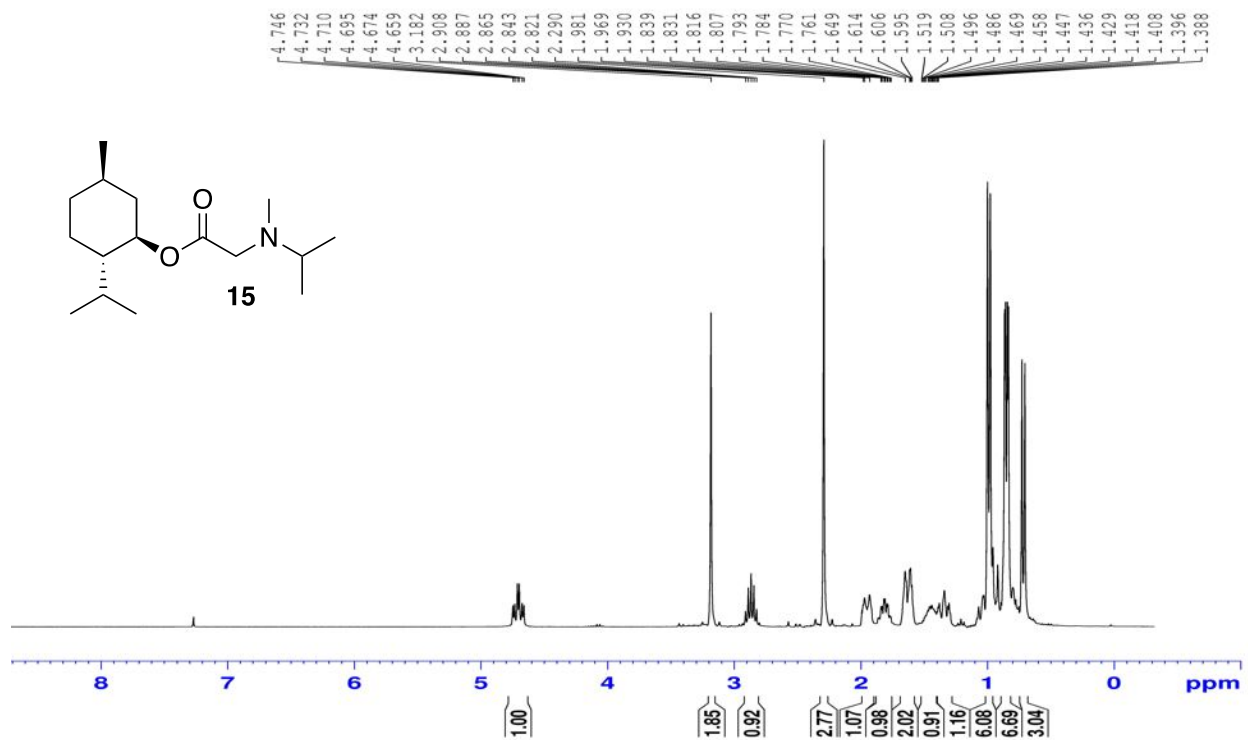

Figure S25. <sup>1</sup>H NMR of compound **15** (CDCl<sub>3</sub>, 300 MHz).

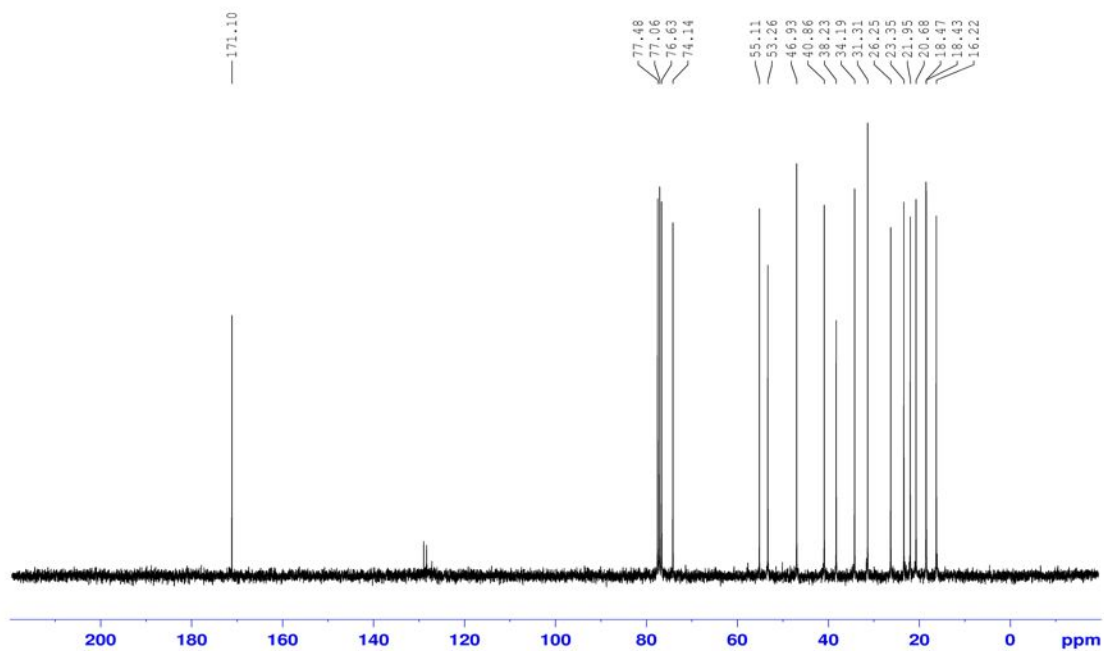

Figure S26. <sup>13</sup>C NMR of compound **15** (CDCl<sub>3</sub>, 75 MHz).

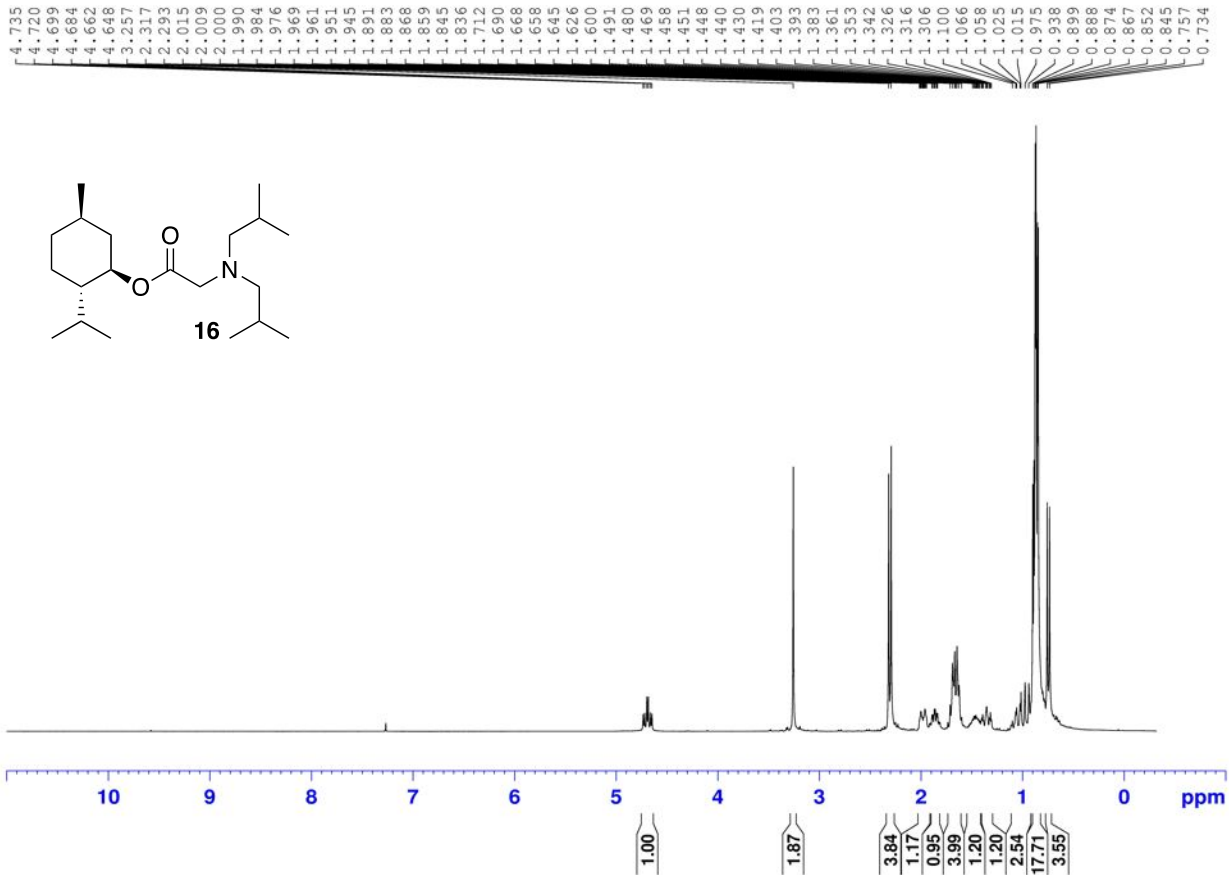

Figure S27. <sup>1</sup>H NMR of compound **16** (CDCl<sub>3</sub>, 300 MHz).

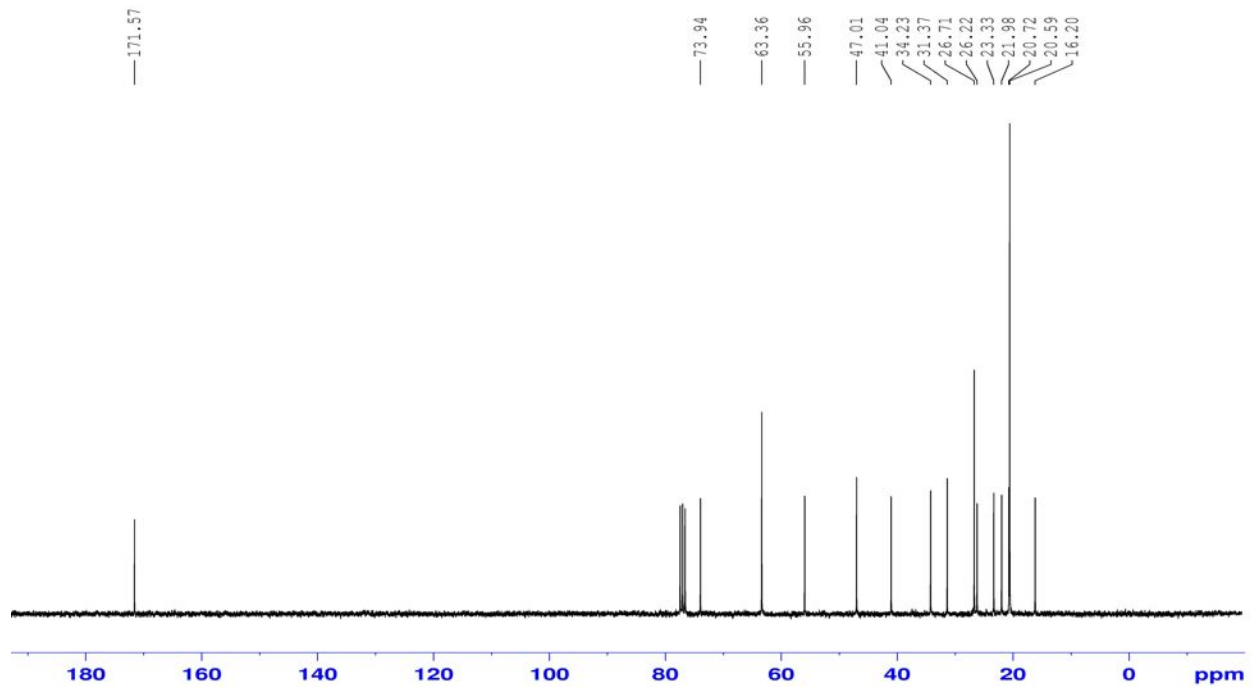

Figure S28. <sup>13</sup>C NMR of compound **16** (CDCl<sub>3</sub>, 75 MHz).

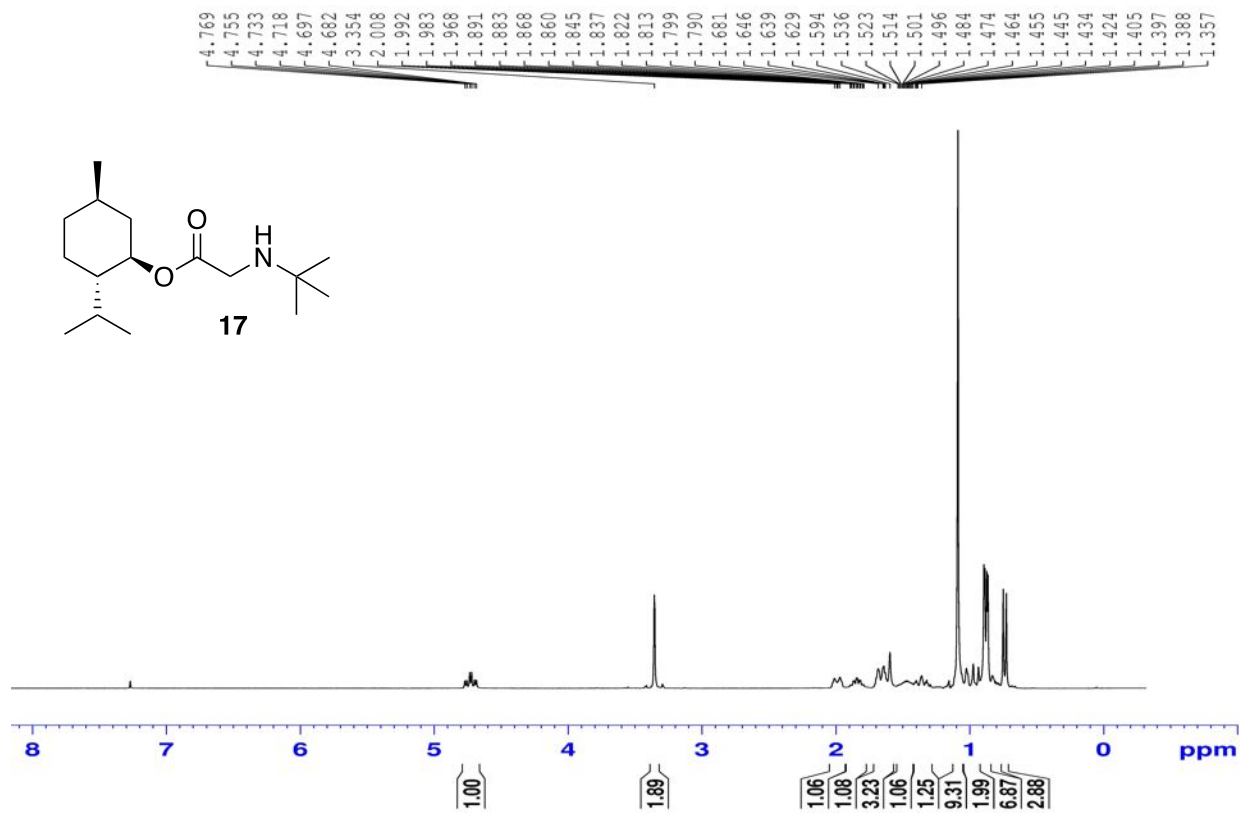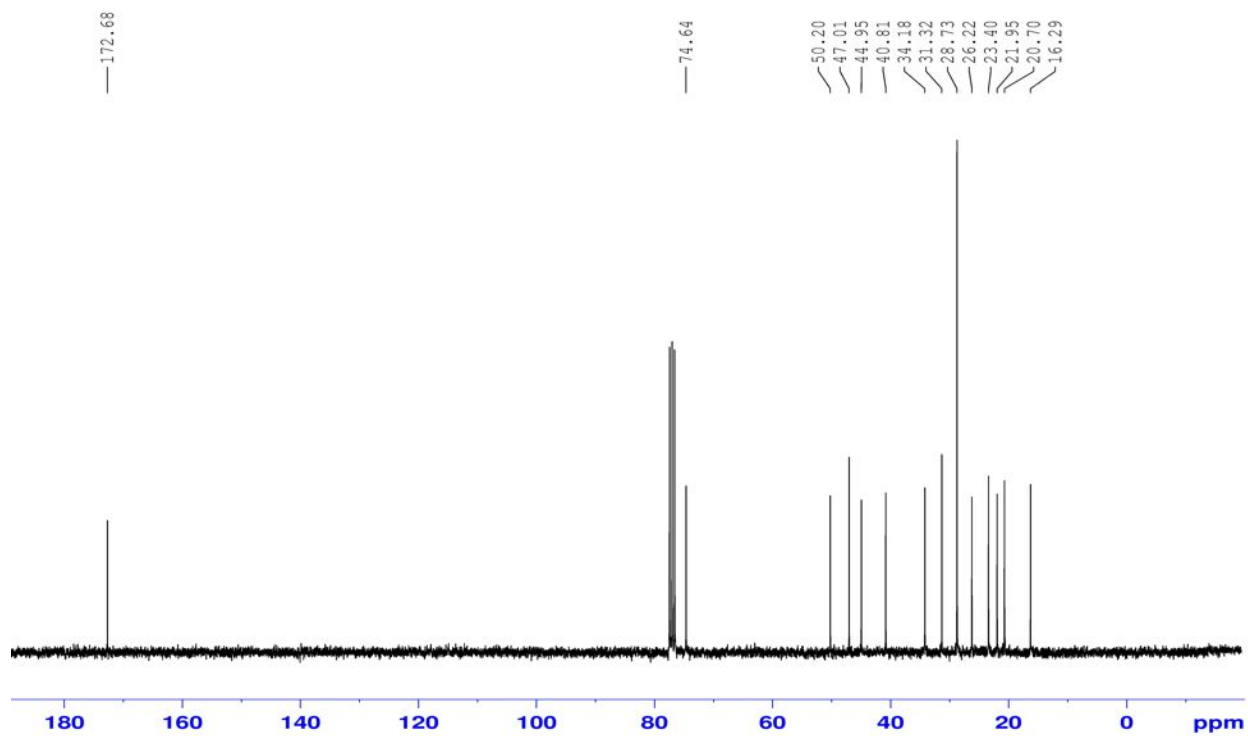



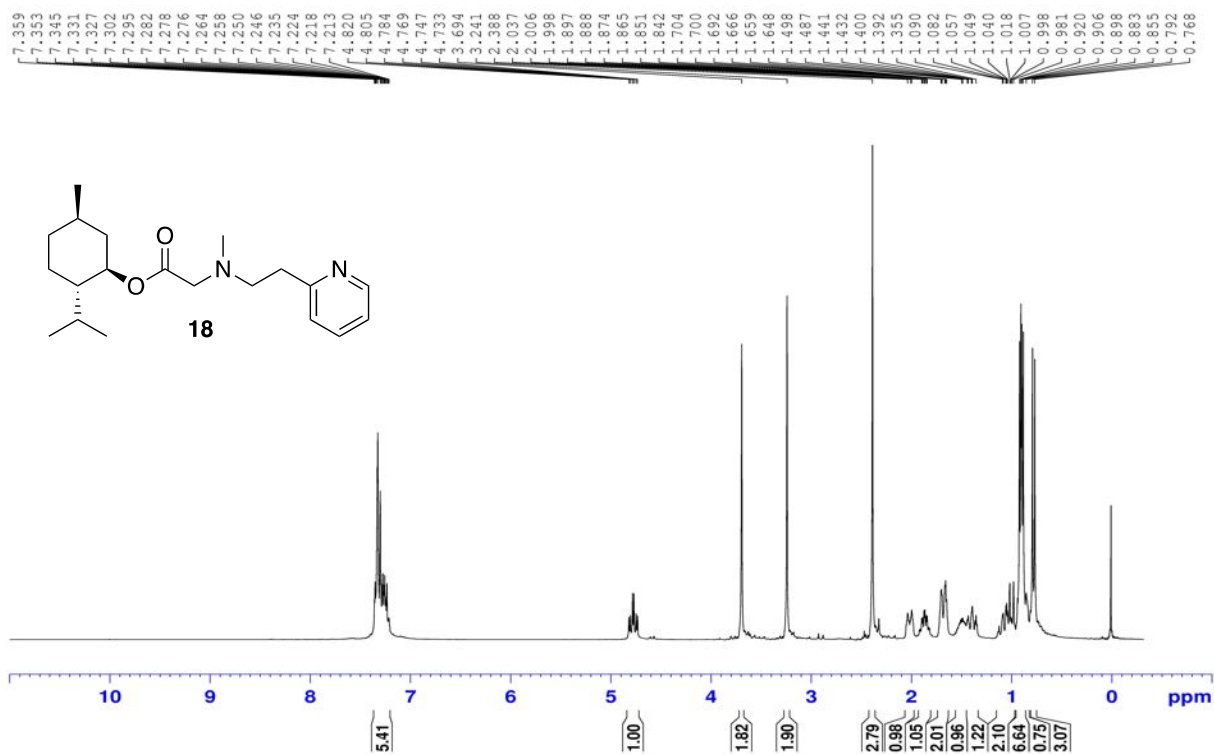

Figure S31. <sup>1</sup>H NMR of compound **18** (CDCl<sub>3</sub>, 300 MHz).

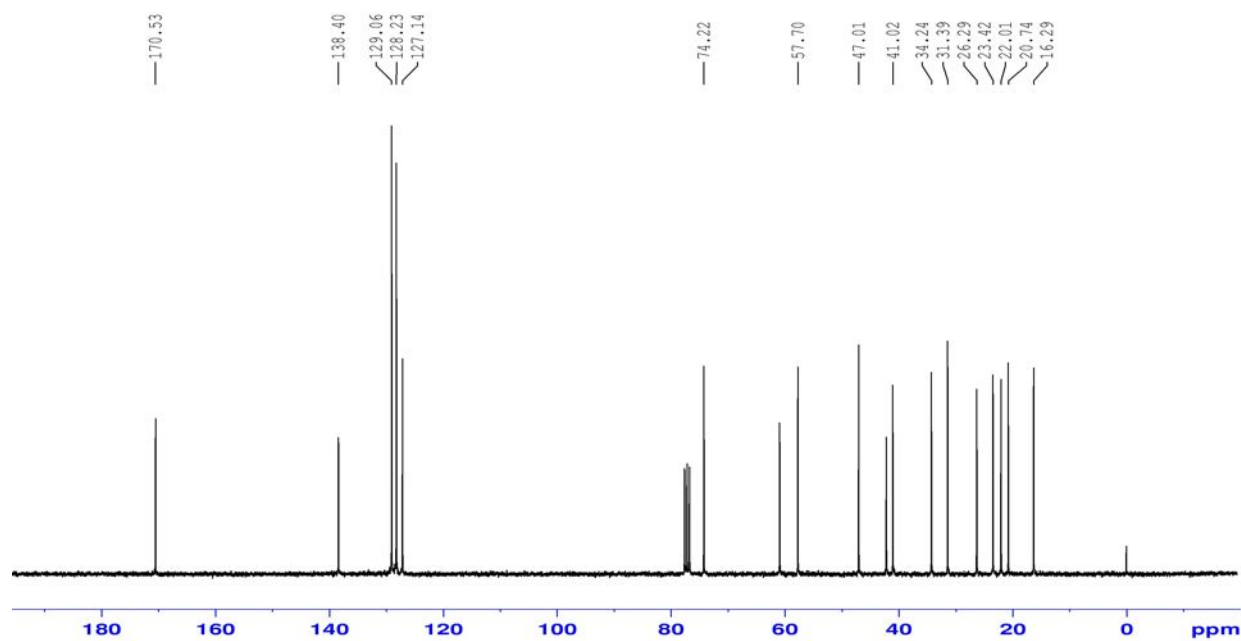

Figure S32. <sup>13</sup>C NMR of compound **18** (CDCl<sub>3</sub>, 75 MHz).

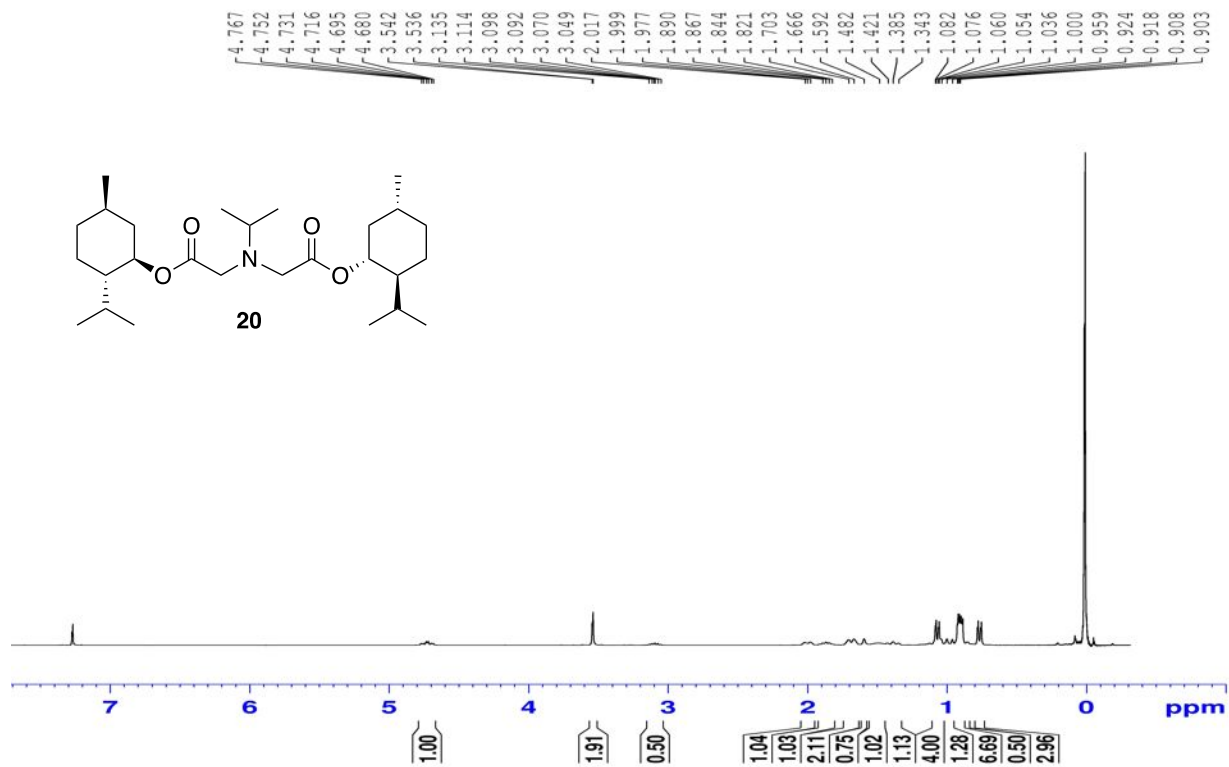

Figure S33. <sup>1</sup>H NMR of compound **20** (CDCl<sub>3</sub>, 300 MHz).

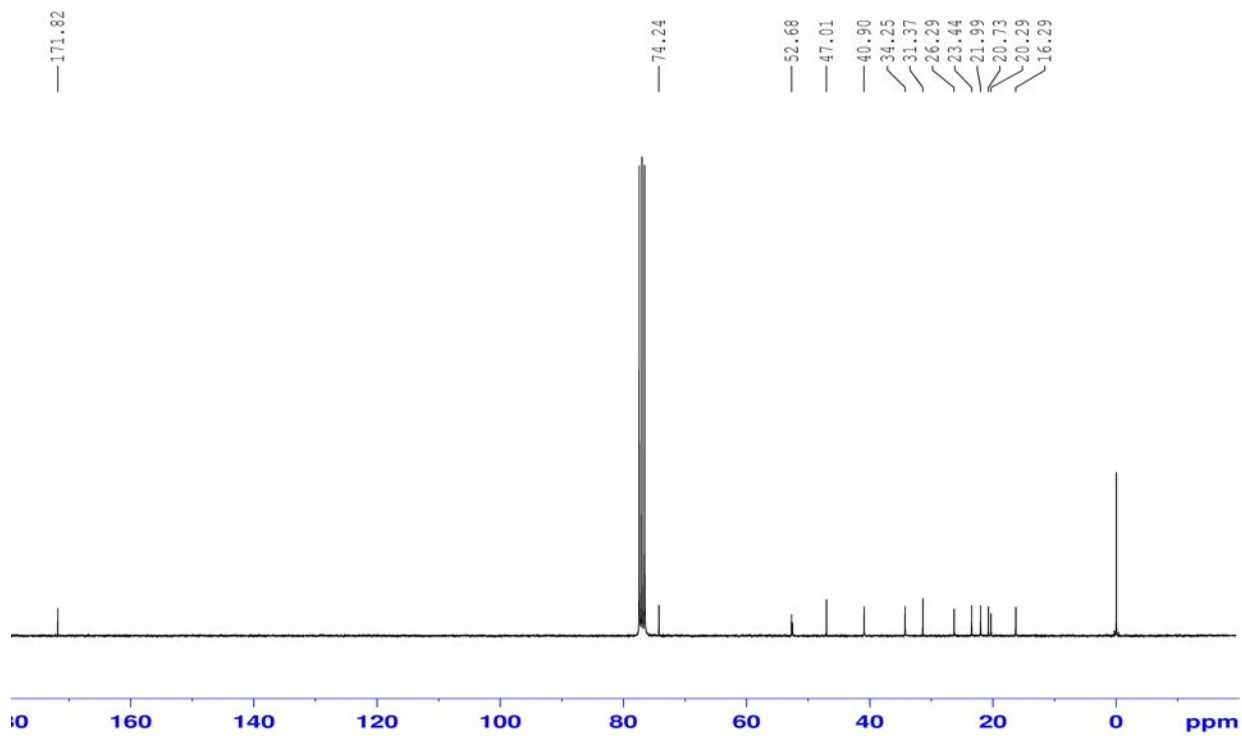

Figure S34. <sup>13</sup>C NMR of compound **20** (CDCl<sub>3</sub>, 75 MHz).

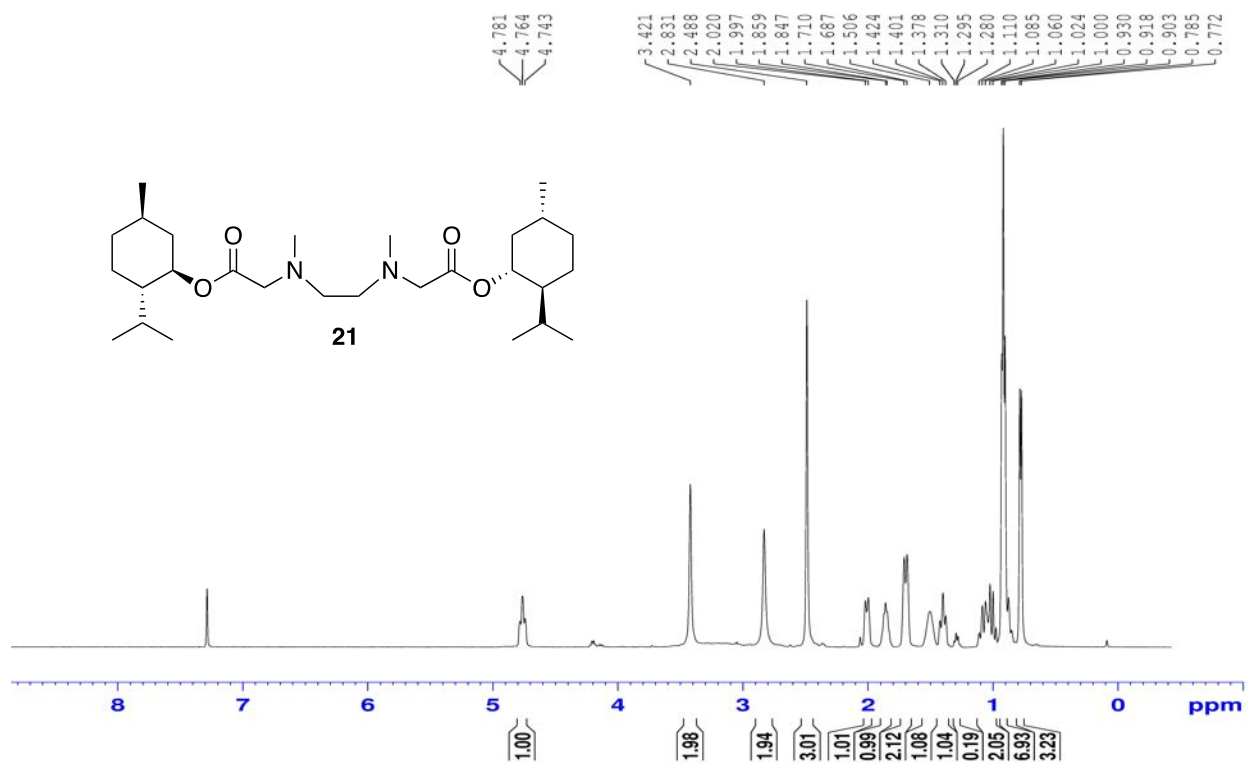

Figure S35. <sup>1</sup>H NMR of compound **21** (CDCl<sub>3</sub>, 300 MHz).

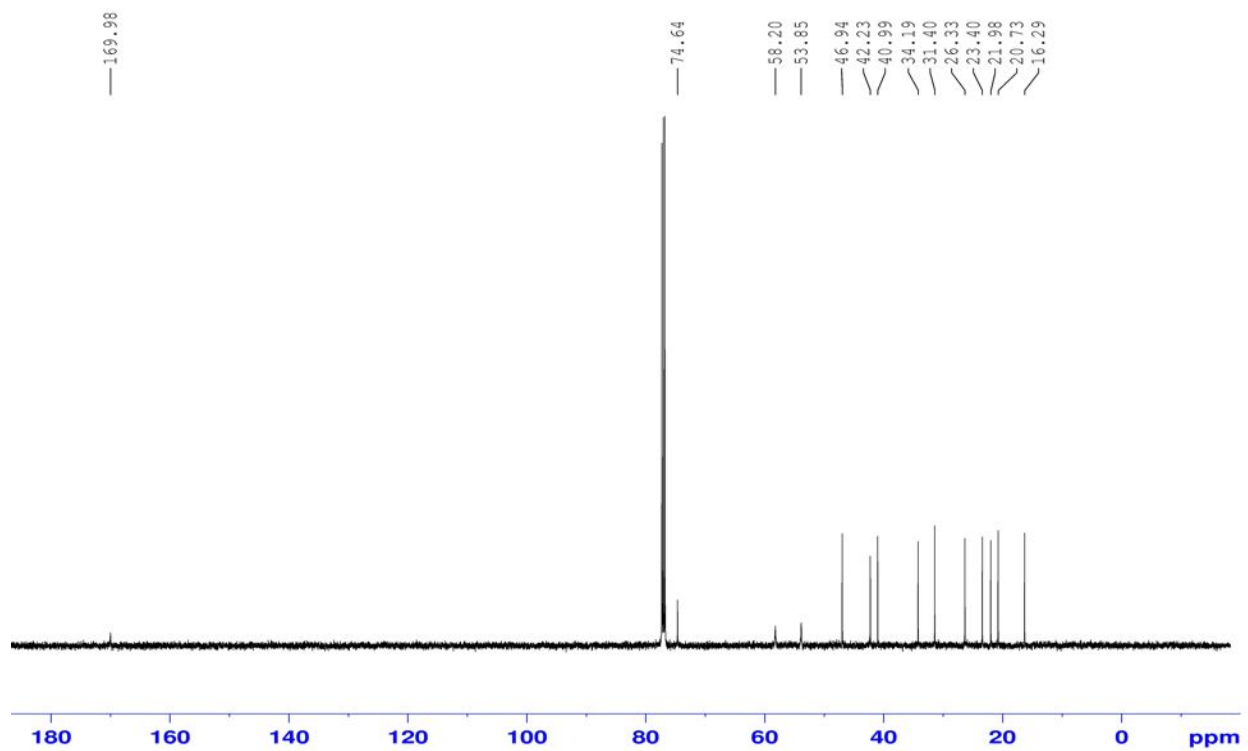

Figure S36. <sup>13</sup>C NMR of compound **21** (CDCl<sub>3</sub>, 75 MHz).
